# Supplementary material for: TCP Transcription Factors in Pineapple: Genome-Wide Characterization and Expression Profile Analysis during Flower and Fruit Development
Source: MDPI journal article supplement (doi:10.3390/horticulturae9070799), 2023-07-13
Supplement: s1 [file s1]

**Supplemental Table S1 The table of primer for qRT-PCR**

| Gene name | primer sequences        |
|-----------|-------------------------|
| qAcTCP1-F | CCCAGCACGAGATCGACAAA    |
| qAcTCP2-F | AAGAATGCGGTGGGTGAACT    |
| qAcTCP3-F | GGGTTCAATTCCGGGTCTT     |
| qAcTCP4-F | CGCCCGAAAATCTAGCAACC    |
| qAcTCP5-F | CGACCGGCACAGCAAGATAA    |
| qAcTCP6-F | ACAAGTCCGACGGGGAGA      |
| qAcTCP7-F | AGAAAGACAAACCTGGAGGAGG  |
| qAcTCP8-F | GCCTATCGCTGCAATCGTTC    |
| qAcTCP9-F | GGAACCTACCTCCCCATCGC    |
| AcActin-F | CTGGCCTACGTGGCACTTGACTT |
| qAcTCP1-R | CGAGGAGCCATTTGAGGGAA    |
| qAcTCP2-R | CAACCGTGCTATTGGTGCTC    |
| qAcTCP3-R | GCATCGACGCGAAGCTC       |
| qAcTCP4-R | TCCTGCGGAGCTATTAGGGA    |
| qAcTCP5-R | AAGAGCGAAGAATTTGCCCG    |
| qAcTCP6-R | GGATCTGGAGGGTTCCGTCG    |
| qAcTCP7-R | TGAATGTTCGTTCCCATCACC   |
| qAcTCP8-R | GTTCCAGCAATGCACCAGTC    |
| qAcTCP9-R | CTCTCGTCCTCGTTCCGC      |
| AcActin-R | CACTTCTGGGCAGCGGAACCTTT |

**Supplemental Table S2 Conserved motif sequences of the TCP family in pineapple**

| Motif | Motif Consensus                                   |
|-------|---------------------------------------------------|
| 1     | KRHTKVGGRRIRLSAVCAARIFDLQDELGHKSPSKTVDWLLQQAEP AI |
| 2     | EEEEEEEEEE                                        |
| 3     | IAATGTGTVP AIATT                                  |
| 4     | LQYQQQQQQQQ                                       |
| 5     | HHHHHD                                            |
| 6     | RKDRHS                                            |
| 7     | VDPNFAKELREKARARARERTREKKRMRWNGLGNGCKIEPM         |
| 8     | NNNKEGECCEGCKNEWGDLIVPSWDICKKGKVDK                |
